# Supplementary material for: Enhanced oxidation resistance and electrical conductivity copper nanowires–graphene hybrid films for flexible strain sensors
Source: Royal Society of Chemistry journal article supplement (doi:10.1039/c7nj00246g), 2017-01-01
Supplement: c7nj00246g1.pdf [file c7nj00246g1.pdf]

## Electronic Supplementary Information

### Enhanced oxidation resistance and electrical conductivity copper nanowires-graphene hybrid films for flexible strain sensors

Yu Zhu,<sup>ab||</sup> Yougen Hu,<sup>ac||</sup> Pengli Zhu,<sup>\*a</sup> Tao Zhao,<sup>a</sup> Xianwen Liang,<sup>a</sup> Rong Sun,<sup>\*a</sup> and Ching-ping Wong<sup>de</sup>

a. Shenzhen Institutes of Advanced Technology, Chinese Academy of Sciences, Shenzhen 518055, China.

b. Nano Science and Technology Institute, University of Science and Technology of China, Suzhou 215123, China

c. Shenzhen College of Advanced Technology, University of Chinese Academy of Sciences, Shenzhen 518055, China

d. Department of Electronic Engineering, The Chinese University of Hong Kong, Hong Kong, China

e. School of Materials Science and Engineering, Georgia Institute of Technology, Atlanta, Georgia 30332, USA

|| These authors contributed equally to this work.

\* Corresponding author E-mail: pl.zhu@siat.ac.cn or rong.sun@siat.ac.cn

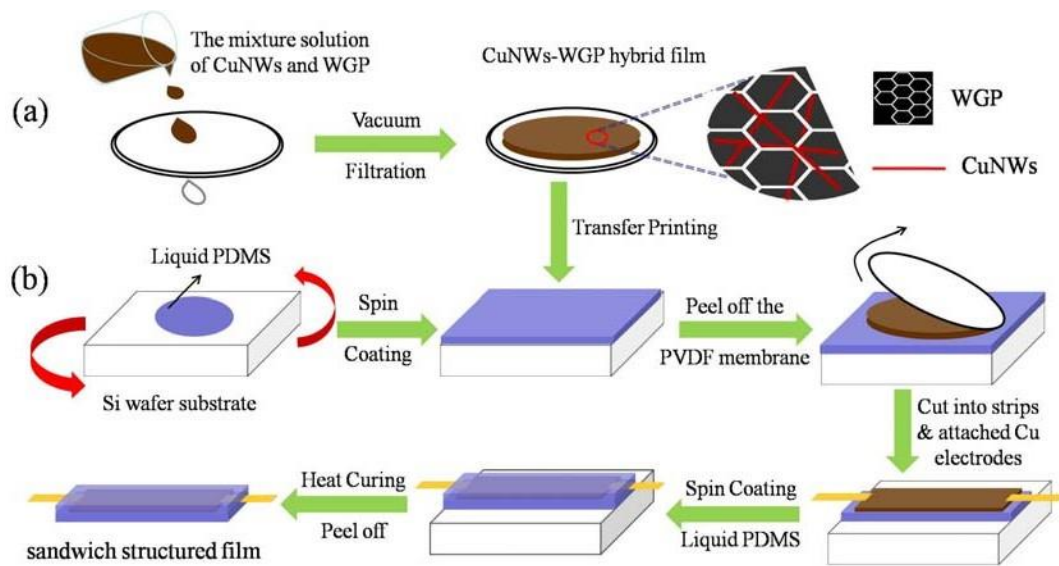

**Fig. S1** Schematic of fabrication processes of (a) CuNWs-WGP hybrid film and (b) PDMS/CuNWs-WGP/PDMS sandwich structured film.

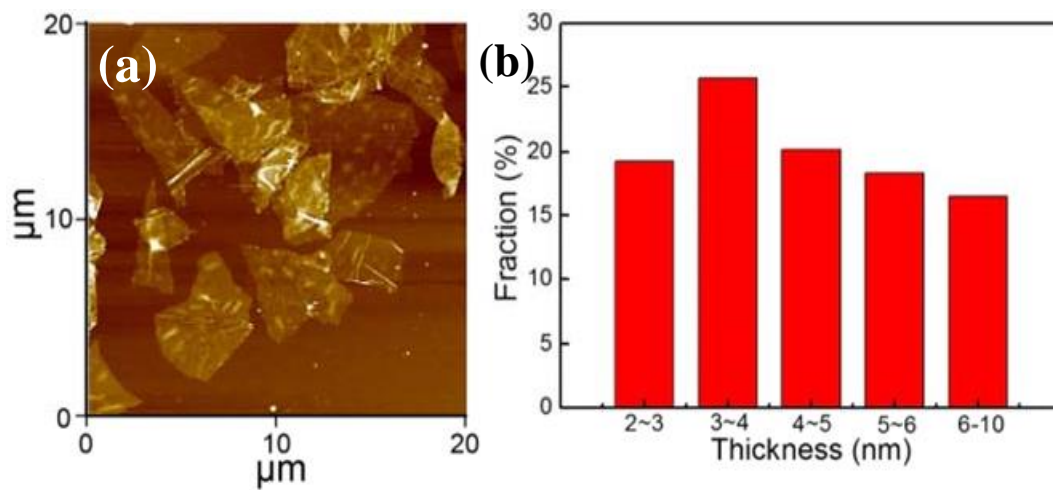

**Fig. S2** (a) AFM image of WGP and (b) thickness distribution histogram of WGP.

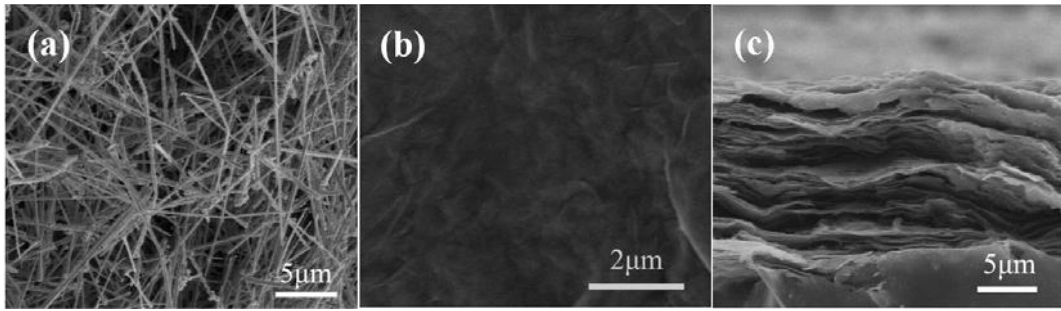

**Fig. S3** (a) SEM image of CuNWs film; (b) Top-view and (c) cross-section SEM images of WGP film.

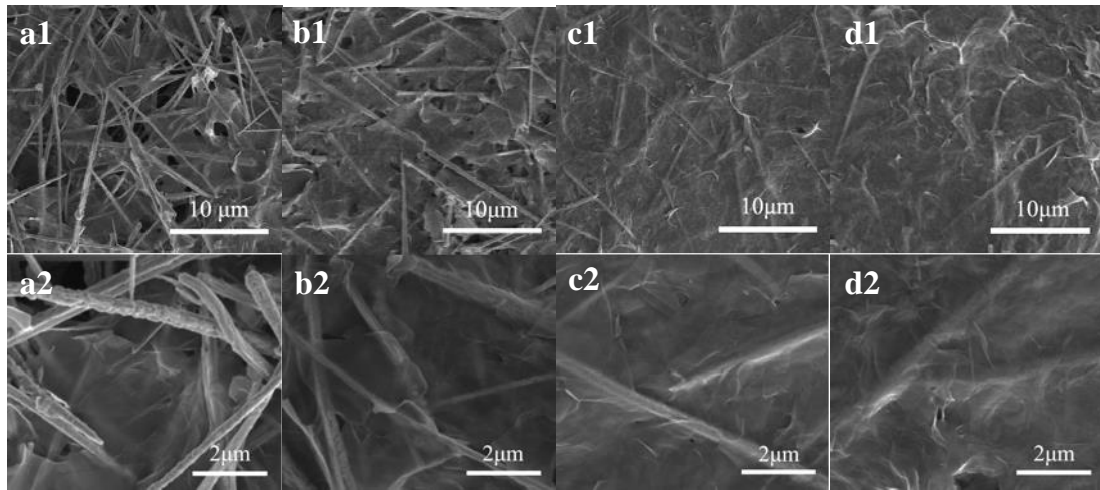

**Fig. S4** SEM images of the WGP-CuNWs hybrid films with various contents of WGP under different magnifications: (a1 and a2) 20.0 wt%, (b1 and b2) 33.3 wt%, (c1 and c2) 40.0 wt% and (d1 and d2) 80.0 wt%.

Table S1 The square resistance and electrical conductivity of the hybrid films (33.3 wt% WGP) with different thickness

| Sample | Thickness<br>( $\mu\text{m}$ ) | Square Resistance<br>( $\Omega \text{ sq}^{-1}$ ) | Electrical Conductivity<br>( $\text{S m}^{-1}$ ) |
|--------|--------------------------------|---------------------------------------------------|--------------------------------------------------|
| 1      | 2.3                            | 119.20                                            | $3.65 \times 10^3$                               |
| 2      | 3.1                            | 36.47                                             | $8.84 \times 10^3$                               |
| 3      | 11.2                           | 8.84                                              | $1.01 \times 10^4$                               |
| 4      | 23.4                           | 3.14                                              | $1.36 \times 10^4$                               |
| 5      | 38.2                           | 0.73                                              | $3.58 \times 10^4$                               |

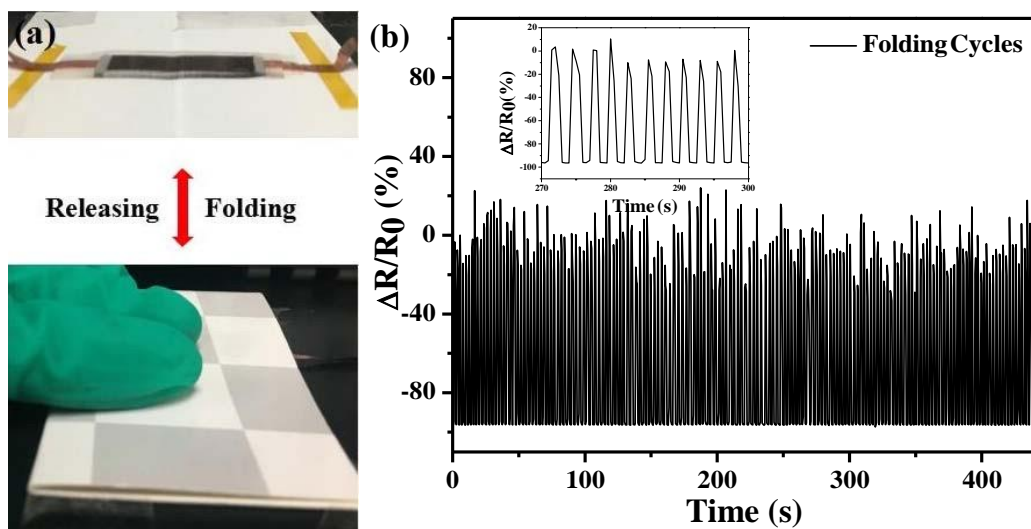

**Fig. S5** (a) Photos of the folding/releasing cyclic test. (b) The resistance change of the sandwich structured film with cyclic folding from  $0^\circ$  to  $180^\circ$ .

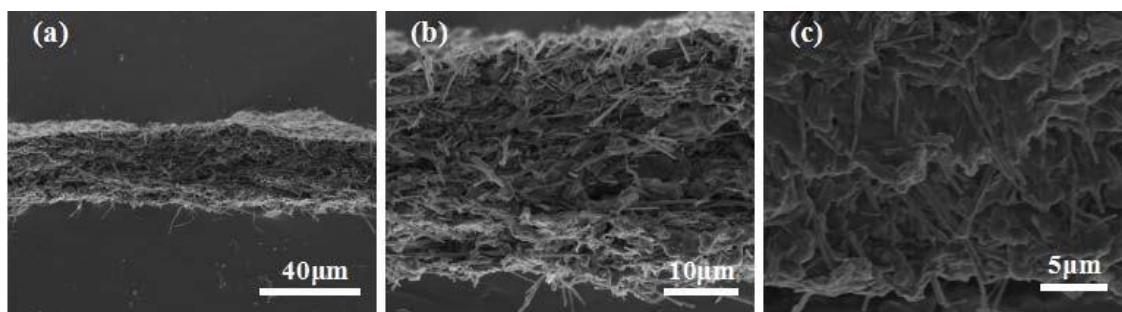

**Fig. S6** Cross-section SEM images of PDMS/CuNWs-WGP/PDMS sandwich structured film with different magnifications.



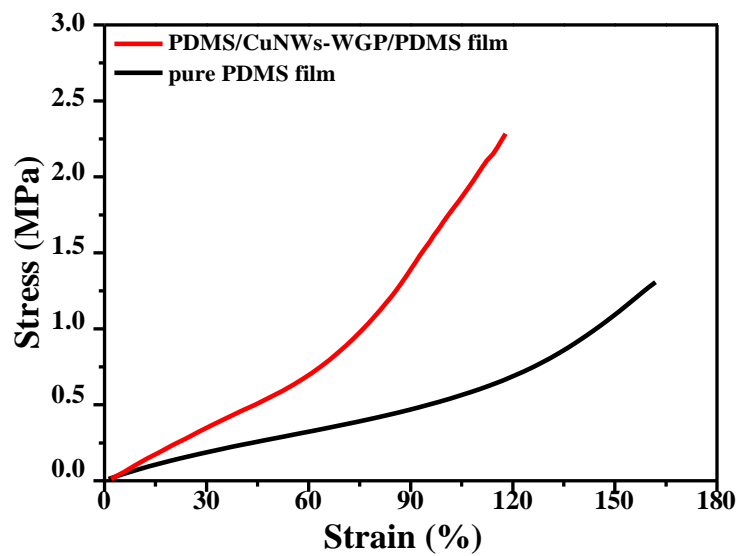

**Fig. S7** The strain-stress curves of pure PDMS film and PDMS/CuNWs-WGP/PDMS sandwich structured film.

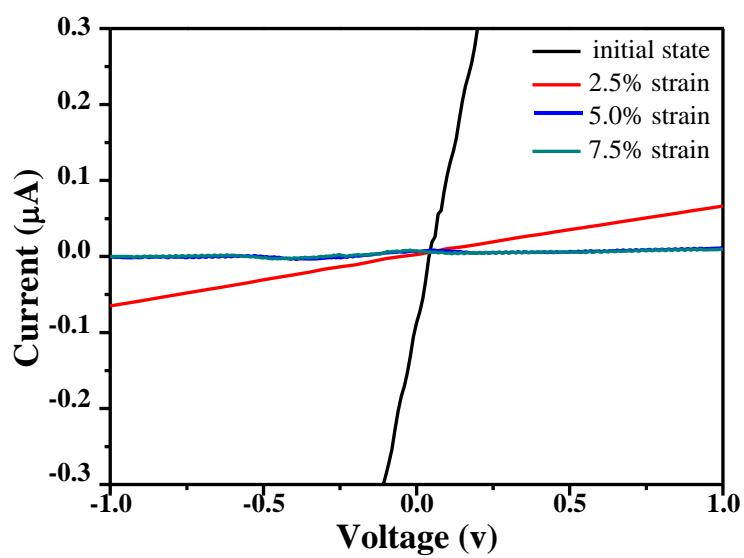

**Fig. S8** Current-voltage curves of the sandwich structured film for different levels of strain.

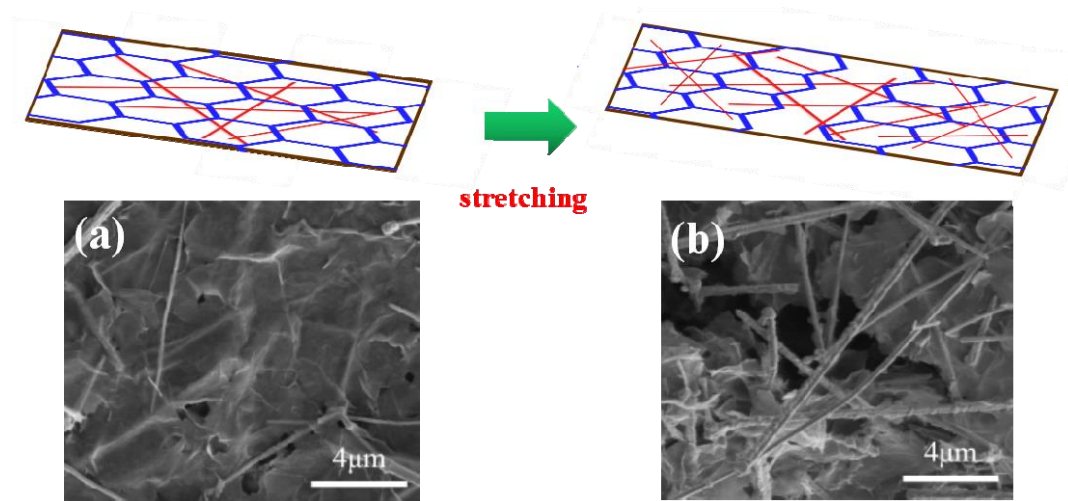

**Fig. S9** The schematic diagram and SEM images of the sandwich structured film under (a) initial state and (b) stretching state, respectively.

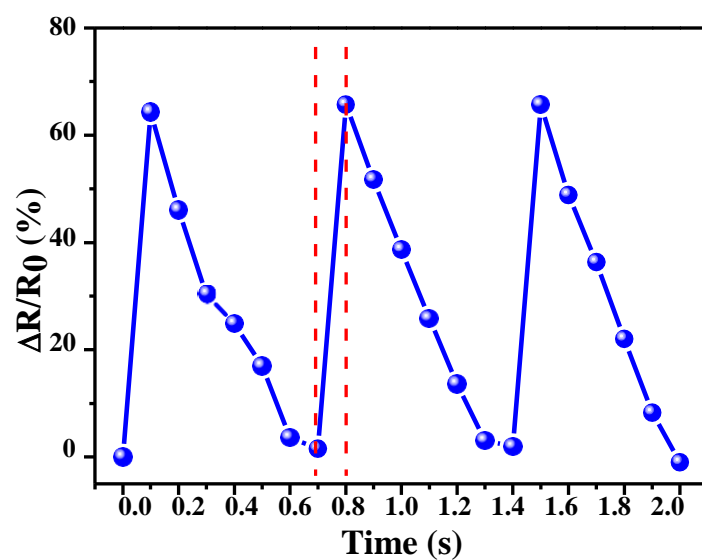

**Fig. S10** Relatively resistance variation of the flexible strain sensor as a function of time. Dashed lines indicated the positions of peaks and valleys of the curves during stretching of the sensor.
